# Supplementary material for: An enhanced non-enzymatic electrochemical sensor based on the Bi2S3–TiO2 nanocomposite with HNTs for the individual and simultaneous detection of 4-nitrophenol and nitrofurantoin in environmental samples
Source: Royal Society of Chemistry journal article supplement (doi:10.1039/d3tb03054g), 2024-01-01
Supplement: d3tb03054g1.pdf [file d3tb03054g1.pdf]

## Enhanced Non-enzymatic Electrochemical Sensor Based on Bi<sub>2</sub>S<sub>3</sub>-TiO<sub>2</sub> Nanocomposite with HNT's for the individual and simultaneous Detection of 4-Nitrophenol and Nitrofurantoin in environmental samples.

Srujan Basavapura Ravikumar<sup>a</sup>, Trishul Alanahalli Mallu<sup>b</sup>, Sirisha Subbareddy<sup>c</sup>, Santhosh Arehalli Shivamurthy<sup>d\*</sup>, Varun Donnakatte Neelalochana<sup>e</sup>, Karthik Chimatahalli Shantakumar<sup>a</sup>, Jothi Ramalingam Rajabathar<sup>f</sup>, Narges Ataollahi<sup>e</sup>, Sandeep Shadakshari<sup>a\*</sup>

<sup>a</sup>Department of Chemistry, SJCE, JSS Science and Technology University, Mysuru, Karnataka 570006, India.

<sup>b</sup>Department of Environmental Engineering, SJCE, JSS Science and Technology University, Mysuru, Karnataka 570006, India.

<sup>c</sup>Department of studies in Physics, University of Mysore, Mysuru, Karnataka, 570006, India

<sup>d</sup>Department of Chemistry (U.G.), N.M.K.R.V. College for Women, Jayanagara 3<sup>rd</sup> block, Bengaluru, Karnataka 560011, India.

<sup>e</sup>Department of Civil, Environmental, and Mechanical Engineering, University of Trento, 38123 Trento, Italy.

<sup>f</sup>Department of Chemistry, College of Science, King Saud University, P.O. Box. 2455, Riyadh, 11451, Saudi Arabia.

Corresponding authors : Dr. Sandeep S, E-mail id: [sandeep12chem@gmail.com](mailto:sandeep12chem@gmail.com)

Dr. Santhosh A S, E-mail id : [santhu41100@gmail.com](mailto:santhu41100@gmail.com)

### Supplimentary data

#### ***S1 Formation mechanism of the Bi<sub>2</sub>S<sub>3</sub>-TiO<sub>2</sub>/HNTs nanocomposite:***

Firstly, the hydrolysis of Ti (OBU)<sub>4</sub> occurs upon the addition of water. Ti (OBU)<sub>4</sub> undergoes hydrolysis to form titanium hydroxide (Ti (OH)<sub>4</sub>) and butanol (C<sub>4</sub>H<sub>9</sub>OH). During the condensation phase, the Ti (OH)<sub>4</sub> molecules undergo condensation reactions to form a network structure of Ti—O—Ti bridges. After multiple condensation events, large polymeric structures are formed [1].

Secondly, bismuth nitrate (Bi (NO<sub>3</sub>)<sub>3</sub>) dissolves in the ethanol-water mixture, releasing Bi<sup>3+</sup> ions. Thiourea ((NH<sub>2</sub>)<sub>2</sub>CS) decomposes in the presence of water and ammonia, releasing S<sup>2-</sup> ions. The Bi<sup>3+</sup> ions react with S<sup>2-</sup> ions to form bismuth sulfide (Bi<sub>2</sub>S<sub>3</sub>) through precipitation. The Bi<sub>2</sub>S<sub>3</sub> and TiO<sub>2</sub> particles then integrate during the sol-gel process, forming a nanocomposite material with both Bi<sub>2</sub>S<sub>3</sub> and TiO<sub>2</sub> phases. The calcination step at 500°C promotes the crystallization of TiO<sub>2</sub> and further stabilizes the Bi<sub>2</sub>S<sub>3</sub>-TiO<sub>2</sub> nanocomposite.

Thirdly, the formation of the composite between Bi<sub>2</sub>S<sub>3</sub>-TiO<sub>2</sub> and HNTs is achieved through a simple sonication method. Here, the Bi<sub>2</sub>S<sub>3</sub>-TiO<sub>2</sub> and HNTs are mixed in equal proportions and sonicated, which creates a force of attraction between the two nanomaterials.

**Table S2.** Emphasizes the Comparison of Electrochemical Performance of various reported electrodes with Bi<sub>2</sub>S<sub>3</sub>-TiO<sub>2</sub>/HNT's

| Material                         | Limit of detection |           | Linear range |          | References |
|----------------------------------|--------------------|-----------|--------------|----------|------------|
|                                  | NFT (nM)           | 4-NP (nM) | NFT (μM)     | 4-NP(μM) |            |
| NiFe/f-MWCNT                     | 30                 | -         | 0.1–352.4    | -        | 2          |
| MgFe <sub>2</sub> O <sub>4</sub> | 33                 | 7         | 0–342.6      | 0–342.6  | 3          |
| M-MWCNTs                         | 167                | 165       | 0.56         | 0.55     | 4          |
| NiO/BCN                          | 10.0               | -         | 0.05–230.0   | -        | 5          |
| SVG-2/GCE                        | 8.7                | -         | 0.035–672.3  | -        | 6          |
| BDDFE                            | 8.2                | -         | 0.497–5.66   | -        | 7          |
| AuNP/RGO                         | -                  | 10        | -            | 0.05–2.0 | 8          |
| GO/GCE                           | -                  | 20        | -            | 0.1-120  | 9          |

|                                                          |     |     |        |           |           |
|----------------------------------------------------------|-----|-----|--------|-----------|-----------|
| rGO–HNT–<br>AgNP/SPCE                                    | -   | 48  | -      | 0.1–363.9 | 10        |
| Nb <sub>2</sub> CTX/ Zn-Co-<br>NC                        | -   | 70  | -      | 1– 500    | 11        |
| <b>Bi<sub>2</sub>S<sub>3</sub>-TiO<sub>2</sub>/HNT's</b> | 3.2 | 3.5 | 0 -260 | 0-260     | This work |

**Table S3:** Simultaneous determination of NFT and 4-NP in pond water samples using the Bi<sub>2</sub>S<sub>3</sub>-TiO<sub>2</sub>/HNT's sensor

| Sample            | Added (μM) | Found (μM) | HPLC Method | Recovery (%) | RSD (%)     |
|-------------------|------------|------------|-------------|--------------|-------------|
| <b>Pond water</b> | 50         | 49.0       | 49.5        | <b>96.5</b>  | <b>2.12</b> |
|                   | 100        | 98.5       | 99.2        | <b>98.4</b>  | <b>3.23</b> |
|                   | 150        | 149.2      | 149.3       | <b>98.2</b>  | <b>3.12</b> |
| <b>Tap Water</b>  | 50         | 48.6       | 49.8        | <b>97.6</b>  | <b>2.62</b> |
|                   | 100        | 99.4       | 98.9        | <b>99.5</b>  | <b>3.55</b> |
|                   | 150        | 149.5      | 148.9       | <b>99.6</b>  | <b>3.58</b> |

## References

1. Sukharevska, N., Bederak, D., Dirin, D., Kovalenko, M. and Loi, M.A., (2020). Energy Technology, **8(1)**, 1900887.
2. Hwa, K. Y., & Sharma, T. S. K. (2020). Scientific reports, **10**, 12256.
3. Baby, J. N., Sriram, B., Wang, S. F., & George, M. (2020). ACS Sustainable Chemistry & Engineering, **8**, 1479-1486.
4. Dighole, R. P., Munde, A. V., Mulik, B. B., Zade, S. S., & Sathe, B. R. (2022). New Journal of Chemistry, **46**, 17272-17281.
5. Kokulnathan, T., & Wang, T. J. (2019). Composites Part B: Engineering, **174**, 106914.
6. Babulal, S. M., Koventhan, C., Chen, S. M., & Hung, W. (2022). Composites Part B: Engineering, **237**, 109847.
7. de Lima-Neto, P., Correia, A. N., Portela, R. R., da Silva Julião, M., Linhares-Junior, G. F., & de Lima, J. E. (2010) Talanta, **80**, 1730-1736.
8. Tang, Y., Huang, R., Liu, C., Yang, S., Lu, Z., & Luo, S. (2013). Analytical methods, **5**, 5508-5514.
9. Li, J., Kuang, D., Feng, Y., Zhang, F., Xu, Z., & Liu, M. (2012). Journal of hazardous materials, **201**, 250-259
10. Hwa, K. Y., Sharma, T. S. K., & Ganguly, A. (2020). Inorganic Chemistry Frontiers, **7**, 1981-1994.
11. Huang, R., Liao, D., Liu, Z., Yu, J., & Jiang, X. (2021). Sensors and Actuators B: Chemical, **338**, 129828.
